# Supplementary material
Source: Springer Nature journal article supplement (https://www.springermedizin.de/resource/supplementary/12936_2009_923_MOESM1_ESM.pdf/9548544)

## House with single rooms

Space organization during the day

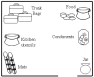

Space organization during the night

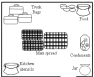

Supplement: MOESM1 [file 9548544]
